# Supplementary material for: Biallelic structural variations within FGF12 detected by long-read sequencing in epilepsy
Source: PubMed Central journal article supplement (PMC10248215; doi:10.26508/lsa.202302025), 2023-06-07

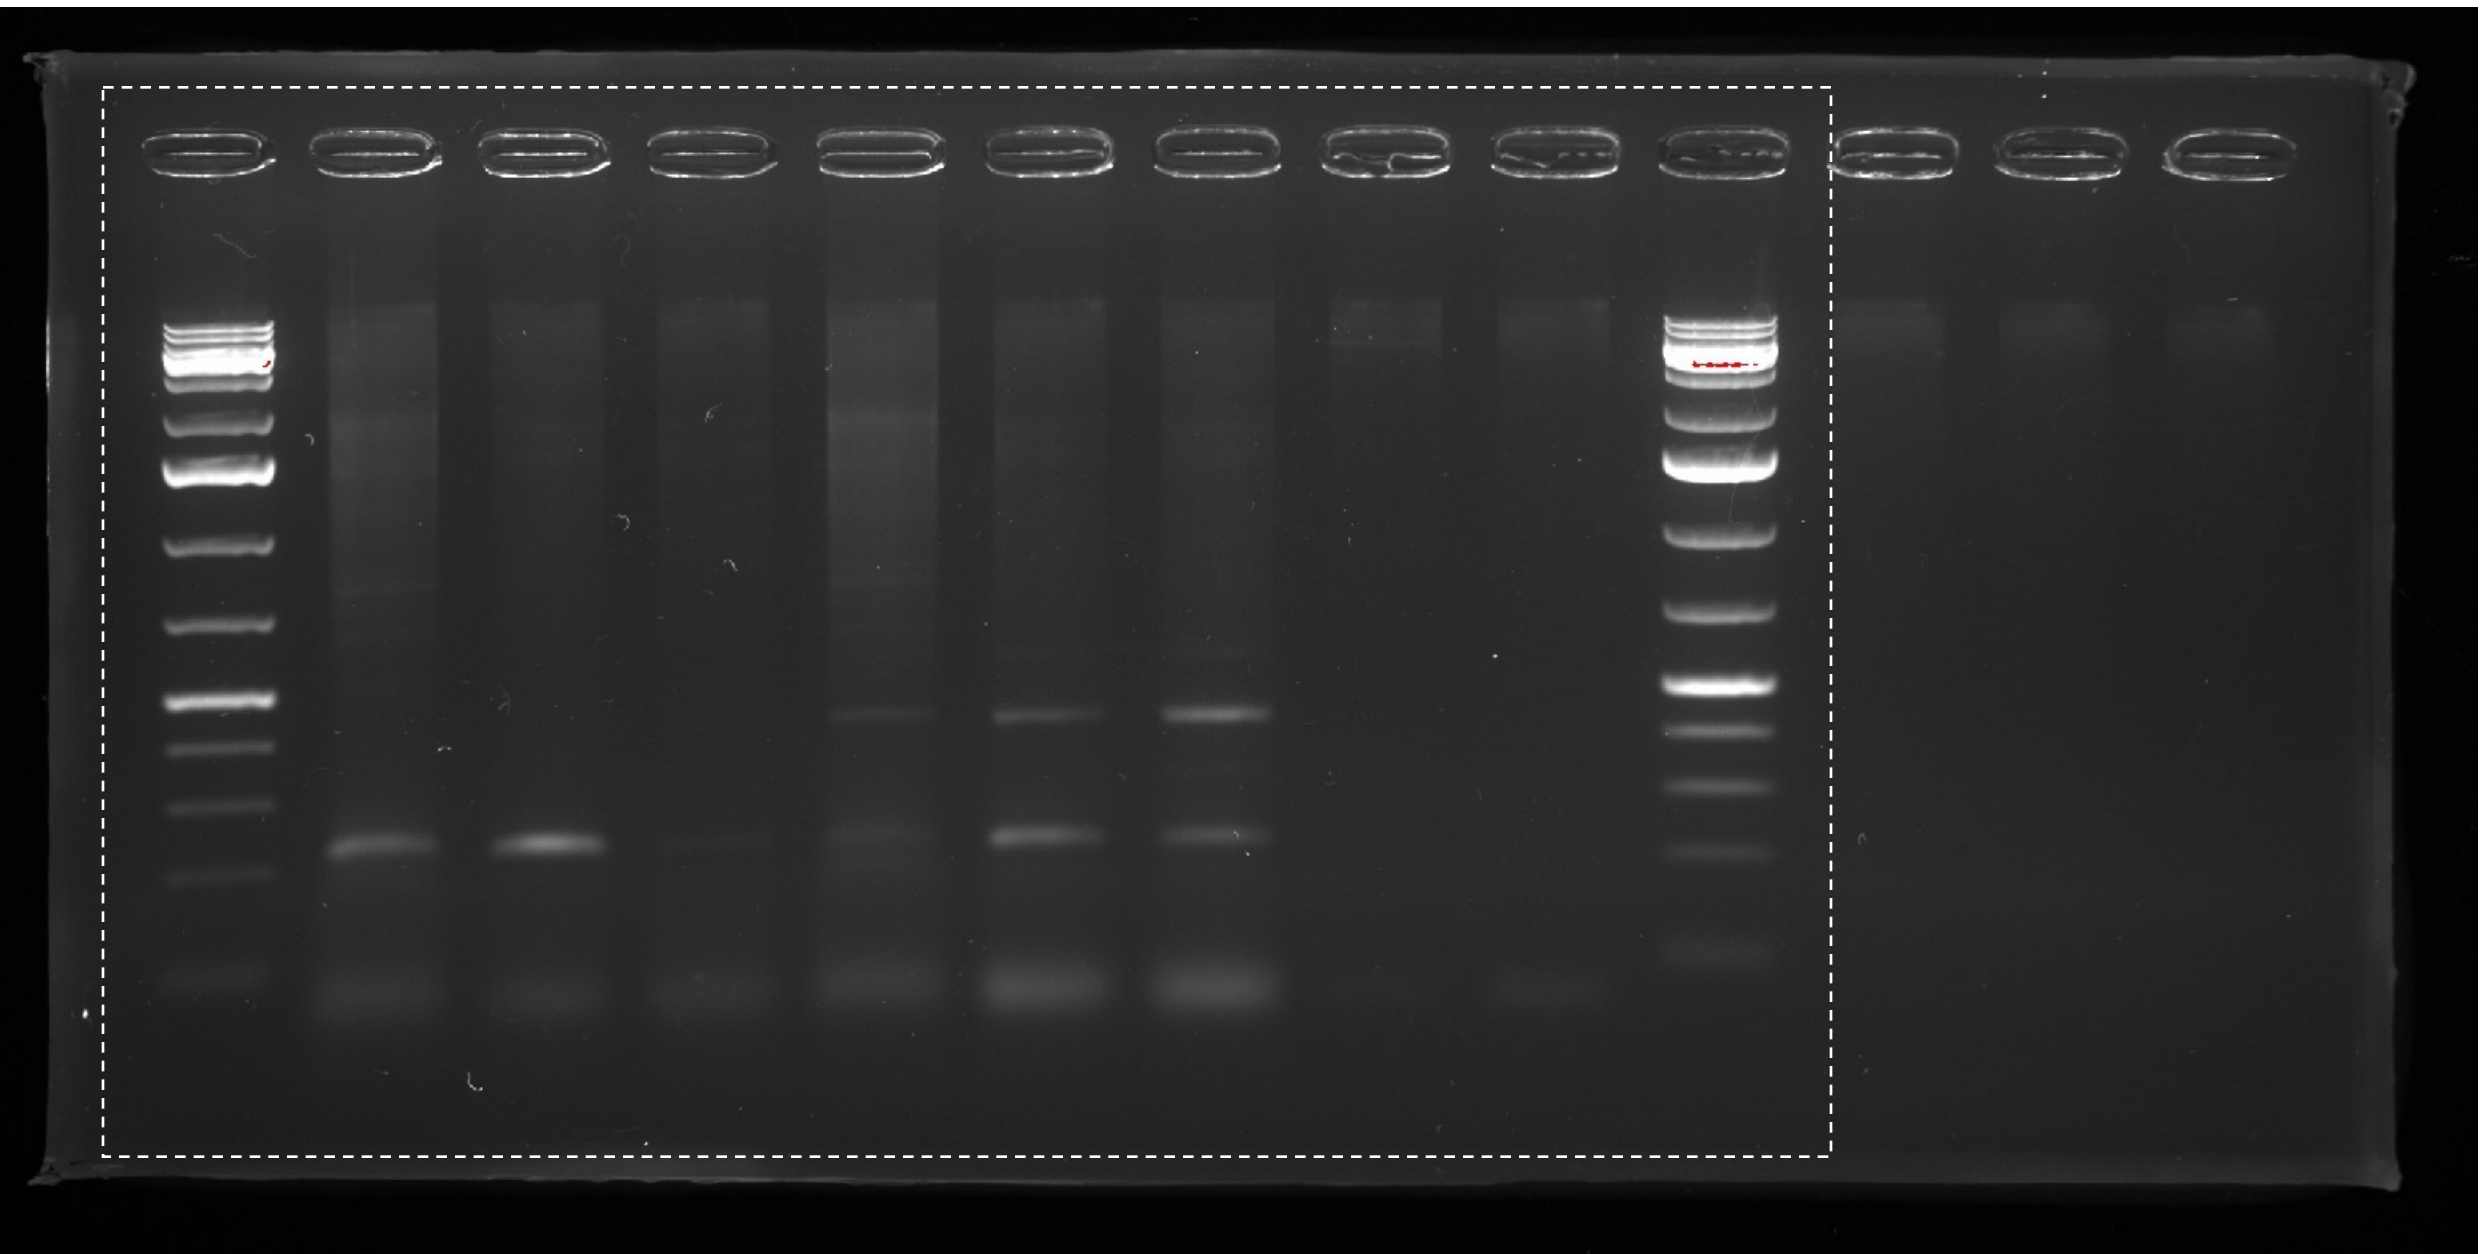

Supplement: LSA-2023-02025_SdataF5.pdf [file LSA-2023-02025_SdataF5.pdf]
